# **Direct synthesis of self-organized blastocyst-like cysts derived from human pluripotent stem cells**

Xiaopeng Wen<sup>1</sup>, Shiho Terada<sup>1</sup>, Koki Yoshimoto<sup>1,2</sup> and Ken-ichiro Kamei<sup>1\*</sup>

*<sup>1</sup>Institute for Integrated Cell-Material Sciences (WPI-iCeMS), Kyoto University, Yoshida-Ushinomiya-cho, Sakyo-ku, Kyoto 606-8501, Japan*

*<sup>2</sup>Faculty of Pharmaceutical Sciences, Kyoto University, Yoshida-Ushinomiya-cho, Sakyo-ku, Kyoto 606-8501, Japan*

\*Corresponding author.

E-mail address: kamei.kenichiro.7r@kyoto-u.ac.jp (KK)

## **Abstract**

We introduce a simple, robust and scalable method to generate self-organized blastocyst-like cysts (soBLCs) from human pluripotent stem cells (hPSCs). We use a copolymer hydrogel of poly(*N*-isopropylacrylamide) and poly(ethylene glycol) (PNIPAAm-PEG). hPSC aggregates with a diameter of approximately  $117.2 \pm 5.1 \mu\text{m}$  are cultured in a medium supplemented with a hydrogel and a serum for three days. Molecular signatures in the medium revealed the generation of trophoblasts and inner cell mass at specific positions in the soBLCs.

## Main

A blastocyst is a cyst developed from the fertilized egg of a mammal approximately 5 to 8 days after fertilization, and it consists of a trophoblast and an inner cell mass (ICM) with a blastocyst cavity. This structure, with its unique cell positioning, is essential for further embryonic development for tissue-specific lineage cell differentiation, and subsequently organ and body structure formation. Therefore, a blastocyst will not only help study the early development of a cell but can also be used in drug discovery for pregnancy failure (e.g., repeated implantation failure<sup>1</sup>) and birth deficiency prevention<sup>2</sup>. However, especially in human beings, it is very difficult to obtain blastocysts from fertilized eggs for fundamental research as well as industrial usage due to limited cell sources / donors and ethical concerns.

Recent studies have reported methods to generate blastocyst-like structures for experimental mouse models<sup>3,4</sup>. However, these studies used and digested blastocysts from fertilized eggs to obtain embryonic stem cells (ESCs)<sup>5</sup> and trophoblast stem cells (TSCs). They re-assembled these ESCs and TSCs to generate blastocyst-like cysts (BLCs). Thus, it is still challenging to generate BLCs directly from pluripotent stem cells alone (PSCs; such as ESCs and induced pluripotent stem cells [iPSCs]<sup>6,7</sup>). In a suspension cell culture, PSCs exhibit embryoid body (EB) formation with cells of three germ layers (e.g., endoderm, mesoderm and ectoderm) under differentiation conditions, or cell spheroids with self-renewing human PSC (hPSC). However, any such reported suspension cell culture did not produce blastocyst-like cysts.

A new method to generate BLCs from hESCs has been reported recently, but it requires special apparatus, such as a microfluidic device.<sup>8</sup> This necessitates an alternative way to culture PSCs and produce BLCs in a simple, robust and scalable way that could be used in biology research laboratories and future drug discovery applications.

In this study, we develop a method to directly form self-organized BLCs (soBLCs) from hPSCs in a hydrogel medium through three-dimensional (3D) cell culture (**Figure 1a**). This method uses a thermo-responsive hydrogel [HG; a copolymer of poly(*N*-isopropylacrylamide) and poly(ethylene glycol) (PNIPAAm-PEG)]<sup>9,10</sup>, which holds hPSC aggregates with mild physical stimuli, without adhering with the cells. Additionally, because it can perform a sol–gel transition via temperature, the HG allows the mixing and harvesting of cell aggregates from the solution at a low temperature (< 20 °C). However, cell culture in a gel medium at high temperatures (37 °C). In comparison, we tested collagen and agarose hydrogels for BLC generation (**Figure S1**). For the differentiation of a part of the hPSC aggregates to the trophoblast lineage, the HG was dissolved in DMEM supplemented with 10%(v/v) fetal bovine serum (FBS). For comparison, a TeSR-E8 hPSC self-renewal medium<sup>11</sup> was also mixed with 10%(w/v) HG. To increase the reproducibility, single-cell-dissociated hPSCs were transferred to AggreWell<sup>12,13</sup> for cell aggregates with controlled uniform sizes. One day after the formation, the hPSC aggregates were mixed in the HG and cultured for 3–5 d. To visualize the expression of octamer-binding transcription factor 4 (OCT4; or POU domain, class 5, transcription factor 1 [POU5F1]) ICM marker, *OCT4* promoter-driven KhES1 hESCs with an enhanced green fluorescent protein (EGFP) were used (named K1-OCT4-EGFP).<sup>14</sup>

In a first, 38.8% of hPSC aggregates (21 out of 54 aggregates) cultured in the hydrogel mixed with DMEM/FBS conditions formed cell aggregates with a cavity, which has a structure closely resembling a blastocyst. On the one hand, a small portion of the cell aggregates expressed the *OCT4* promoter-driven EGFP. The outer cell layer, however, did not express EGFP adequately (**Figure 1b**). On the other hand, K1-OCT4-EGFP cells cultured in TeSR-E8 medium-mixed hydrogels showed cell spheroids that strongly expressed EGFP—meaning that cultured hPSCs maintain its stemness in the tested hydrogels (**Figure 1c**). In

fact, these spheroids contain small cavities; however, most of the cells retained the EGFP expression. This result indicates that the self-renewing stimulants in the TeSR-E8 medium strongly retained the stemness of the cultured hPSCs, even in hydrogel. This result is in agreement with that of our previous report<sup>9</sup>. These results indicate that hydrogel conditions along with the serum facilitate the formation of cell aggregates with blastocyst-like structure.

We then evaluated the molecular signatures as indication of a blastocyst (**Figure 2**). To this end, first, we observed the gene expression of caudal homeobox 2 (*CDX2*<sup>15</sup>), which trophoblasts of a blastocyst specifically expressed (**Figure 2a**). We also evaluated the expression of *OCT4*. While the self-renewing K1-OCT4-EGFP cells expressed *OCT4* but not the *CDX2* gene, the obtained hBLCs were able to increase the expression of *CDX2* (640 folds) and reduced that of *OCT4* (0.4 folds). We also observed other markers for the trophoblasts [e.g., Leukemia Inhibitory Factor Receptor (*LIFR*), Keratin 8 (*KRT8*), and GATA binding protein 3 (*GATA3*)] confirmed that those markers were specifically found in soBLCs, and the the marker of ICM (e.g., *NANOG*) were reduced in soBLCs. These results also imply that the blastocyst cells were differentiated by hPSCs in the cysts. To evaluate the cellular population within the soBLCs, we conducted flow cytometry to gauge the expressions of SSEA-1 and SSEA-4, which are also markers of trophoblast and ICM cells, respectively<sup>16-18</sup> (**Figure 2c**). In the soBLCs, the percentages of SSEA-1<sup>+</sup>: SSEA-4<sup>-</sup> was 0.593%, while the self-renewing hPSC spheroids contain only the 0.055% of SSEA-1<sup>+</sup>: SSEA-4<sup>-</sup> cells.

In conclusion, we established a simple and robust method to generate human soBLCs from only hPSCs. The hydrogel enables better environments for the formation of soBLCs, which suggests that a certain physical property of the gel plays an important role in the soBLC formation and not the fluid property. Recently, some methods for BLC production have been. However, they need to use *in vitro* fertilized mice eggs and dissociate them. We

envision that this method could be improved further to develop clinically relevant and chemically defined conditions, with the goal of understanding the basis of early embryonic development. By using PSCs of other experimental animals (e.g. mouse and rat), we should be able to evaluate the applicability of our methods for BLC generation. This method could be extended to other species to understand the fundamentals of early embryonic development, by comparing multiple species without using their embryos, and to high-throughput screening in drug discovery for pregnancy failure prevention, as well as birth defects.

### **Acknowledgements**

Funding was generously provided by the Japan Society for the Promotion of Science (JSPS; 17H02083). The WPI-iCeMS is supported by the World Premier International Research Centre Initiative (WPI), MEXT, Japan.

### **Author contributions**

X.W. and K.K. conceptualized the work. X.W., K.Y., K.H. and S.T. performed the experiments. All the authors contributed to data analysis, discussion, and interpretation. X.W. and K.K. wrote and revised the manuscript with input from all authors.

### **Competing financial interests**

Kyoto University (X.W., S.T., and K.K.) filed a patent application based on the research presented herein. The rest of the authors declare no competing interests.

## References

1. Simon, A. & Laufer, N. Assessment and treatment of repeated implantation failure (RIF). doi:10.1007/s10815-012-9861-4
2. Norwitz, E. R. *Defective implantation and placentation: laying the blueprint for pregnancy complications*. **13**, (2006).
3. Kime, C. *et al.* Induced 2C Expression and Implantation-Competent Blastocyst-like Cysts from Primed Pluripotent Stem Cells. *Stem Cell Reports* **13**, 485–498 (2019).
4. Rivron, N. C. *et al.* Blastocyst-like structures generated solely from stem cells. *Nature* **557**, 106–111 (2018).
5. Thomson, J. A. Embryonic Stem Cell Lines Derived from Human Blastocysts. *Science* (80-. ). **282**, 1145–1147 (1998).
6. Takahashi, K. & Yamanaka, S. Induction of Pluripotent Stem Cells from Mouse Embryonic and Adult Fibroblast Cultures by Defined Factors. *Cell* **126**, 663–676 (2006).
7. Takahashi, K. *et al.* Induction of Pluripotent Stem Cells from Adult Human Fibroblasts by Defined Factors. *Cell* **131**, 861–872 (2007).
8. Zheng, Y. *et al.* Controlled modelling of human epiblast and amnion development using stem cells. *Nature* **573**, 421–425 (2019).
9. Kamei, K. *et al.* Characterization of Phenotypic and Transcriptional Differences in

- Human Pluripotent Stem Cells under 2D and 3D Culture Conditions. *Adv. Healthc. Mater.* **5**, 2951–2958 (2016).
10. Kamei, K. *et al.* 3D printing of soft lithography mold for rapid production of polydimethylsiloxane-based microfluidic devices for cell stimulation with concentration gradients. *Biomed. Microdevices* **17**, 36 (2015).
  11. Chen, G. *et al.* Chemically defined conditions for human iPSC derivation and culture. *Nat. Methods* **8**, 424–429 (2011).
  12. Ungrin, M. D., Joshi, C., Nica, A., Bauwens, C. & Zandstra, P. W. Reproducible, ultra high-throughput formation of multicellular organization from single cell suspension-derived human embryonic stem cell aggregates. *PLoS One* **3**, (2008).
  13. Bauwens, C. L. *et al.* Control of Human Embryonic Stem Cell Colony and Aggregate Size Heterogeneity Influences Differentiation Trajectories. *Stem Cells* **26**, 2300–2310 (2008).
  14. Kumagai, H., Suemori, H., Uesugi, M., Nakatsuji, N. & Kawase, E. Identification of small molecules that promote human embryonic stem cell self-renewal. *Biochem. Biophys. Res. Commun.* **434**, 710–716 (2013).
  15. Strumpf, D. Cdx2 is required for correct cell fate specification and differentiation of trophectoderm in the mouse blastocyst. *Development* **132**, 2093–2102 (2005).
  16. Katagiri, Y. U. *et al.* Functional Significance of Stage-Specific Embryonic Antigens in the



*Development of Preimplantation Embryos. Trends in Glycoscience and*

*Glycotechnology* **20**, (Forum: Carbohydrates Coming of Age, 2008).

17. Henderson, J. K. *et al.* Preimplantation Human Embryos and Embryonic Stem Cells Show Comparable Expression of Stage-Specific Embryonic Antigens. *Stem Cells* **20**, 329–337 (2002).
18. Breimer, M. E., Säljö, K., Barone, A. & Teneberg, S. Glycosphingolipids of human embryonic stem cells. *Glycoconj. J.* **34**, 713–723 (2017).

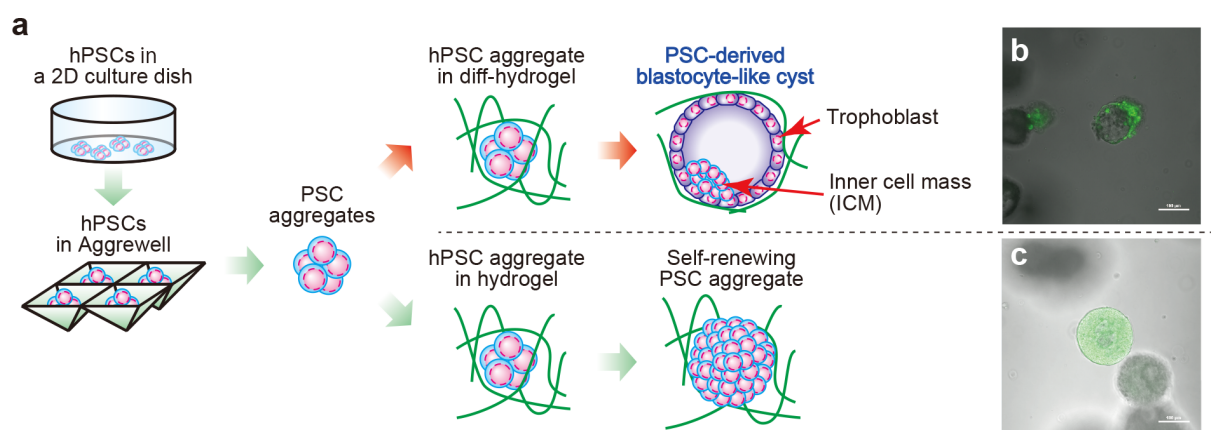

**Figure 1. Principle of generating self-organized blastocyst-like cell cysts (soBLCs)**

**derived from human pluripotent stem cells (hPSCs).** **a**, Schematic of experimental process

of generating hPSCs from blastocyst-like cell aggregates. Hydrogel with self-renewing hPSC culture medium (e.g., TeSR-E8) provides spheroid cells. Hydrogel with serum provides cell

aggregates with a small cavity inside, which resembles a blastocyst. **b**, An overlaying micrograph of DIC and green fluorescence of a self-organized blastocyst-like cyst (soBLC) derived from K1-OCT4-EGFP cells in a hydrogel containing DMEM with 10%(v/v) FBS. The scale bar is 100  $\mu\text{m}$ .

**c**, An overlaying micrograph of DIC and green fluorescence of an aggregate of K1-OCT4-EGFP cells in hydrogel contain TeSR-E8 medium. Scale bar represents 100  $\mu\text{m}$ .

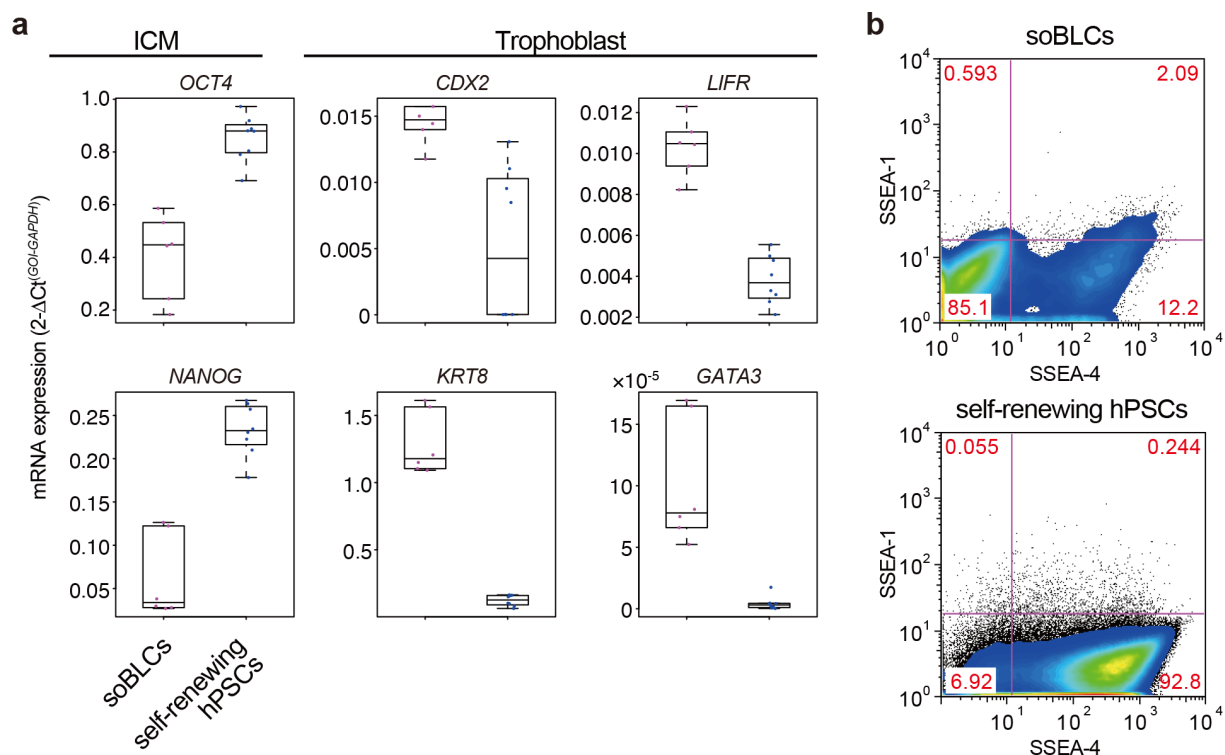

**Figure 2. hPSC-derived BLCs with identical structures and molecular signature of a**

**blastocyst. a**, Box plots of gene expressions associated with inner cell mass (ICM; *OCT4* and *NANOG*) and trophoblasts (*CDX2*, *LIFR*, *KRT8*, and *GATA3*). Center lines of boxplots are the medians; box limits indicate the 25th and 75th percentiles; whiskers extend to 1.5 times the interquartile range, from the 25th and 75th percentiles. **b**, Flow cytometric analysis to evaluate the cellular populations of soBLCs and self-renewing hPSCs according to the expressions of SSEA-1 and SSEA-4. The typical graphs of flow cytometry from the experiments, which were repeated at least thrice, are shown here.

## Methods

**Self-organization of blastocyst-like cyst (soBLC) from hPSCs.** hESCs were used according to the guidelines of the ethical committee of Kyoto University. K1-OCT4-EGFP was obtained from Eihachiro Kawase.<sup>14</sup> Cultured on Matrigel-coated dishes in TeSR-E8 medium, the hPSCs were trypsinized and collected in a 15-mL tube. The dissociated hPSCs were resuspended in the Dulbecco's modified Eagle medium (DMEM) supplemented with 10% (v/v) FBS (Cell Culture Bioscience), 1% (v/v) non-essential amino acids (NEAA; Thermo Fisher Scientific), and 1% (v/v) penicillin/streptomycin (PS; Thermo Fisher Scientific), then transferred into Aggrewell 400 (Stem Cell Technologies) at  $6 \times 10^5$  cells per well. After culturing in an incubator for 24 h at 37 °C with 5% (v/v) CO<sub>2</sub>, the hPSC aggregates were resuspended in blastocyst formation medium {DMEM supplemented with 10% (v/v) FBS, 1% (v/v) NEAA, and 1% (v/v) PS, 10%[w/v] HG (Mebiol Inc., Hiratsuka, Japan)} or TeSR-E8/HG medium (TeSR-E8 medium supplemented with 10%[w/v] HG and 10 μM Y-27632 [Wako Chemicals]) at 4 °C. 500 μL of an hPSC aggregate suspension with HG was transferred into a well of a 6-well plate, and then the appropriate culture medium was added at 37 °C. The medium was changed daily, and the cells were maintained in an incubator at 37 °C with 5% (v/v) CO<sub>2</sub>.
